# Supplementary material for: Unexpected Phase Stability of Anatase TiO2 Nanocrystals at Ultrahigh Temperature via Surface Restructuring
Source: Research Square preprint supplement (doi:10.21203/rs.3.rs-6475787/v1), 2025-05-06
Supplement: Supplementary file 1 [file 11f747abbf3874c2ac6e8e07.docx]

Supplementary Information for

**Ultra-High Thermal Stability of Anatase TiO2 Nanorods by Surface Reconstructing**

Xiaoyun Guo1†, Yujing Zhang2,3†, Chao Yang4, Yunhao Lu*4,5*, Yang Ou1, Beien Zhu2,3, Ying Jiang1, Zhong-kang Han1*, Wentao Yuan1*, Hangsheng Yang1, Yi Gao2,3, Ze Zhang1 and Yong Wang1*

1Center of Electron Microscopy and State Key Laboratory of Silicon and Advanced Semiconductor Materials, School of Materials Science and Engineering, Zhejiang University, Hangzhou, 310027, China

2Photon Science Research Center for Carbon Dioxide, Shanghai Advanced Research Institute, Chinese Academy of Sciences, Shanghai, 201210, China

3Key Laboratory of Interfacial Physics and Technology, Shanghai Institute of Applied Physics, Chinese Academy of Sciences, Shanghai, 201800, China

4State Key Laboratory of Silicon and Advanced Semiconductor Materials, School of Materials Science and Engineering, Zhejiang University, Hangzhou, 310027, China

5Zhejiang Province Key Laboratory of Quantum Technology and Device, School of Physics, Zhejiang University, Hangzhou, 310027, China

†These authors contributed equally to this work.

*Corresponding author. Email: wentao_yuan@zju.edu.cn; hanzk@zju.edu.cn; yongwang@zju.edu.cn;

**Table of Contents**

1. **Supplementary Figures (1-6)**
2. **Supplementary Videos (1-3)**

**
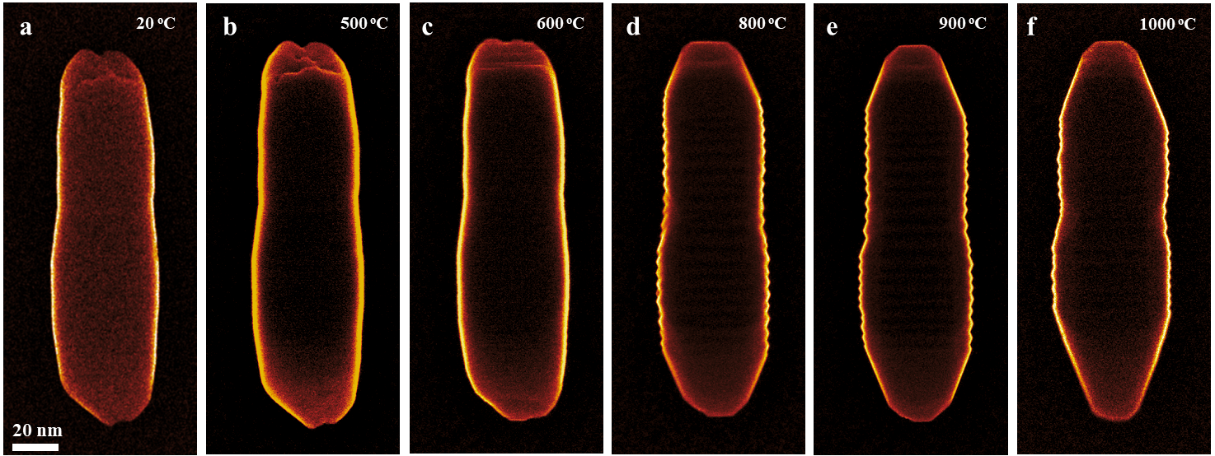
**

**Supplementary Fig. 1. The morphology evolution of a anatase TiO2 nanorod.** In situ HRSEM images of a typical anatase TiO2 nanorod in the heating process in vacuum (TEM column pressure: 5×10-5Pa). **a-f**, A typical morphology evolution process of the anatase TiO2 nanorod at different temperatures.

**
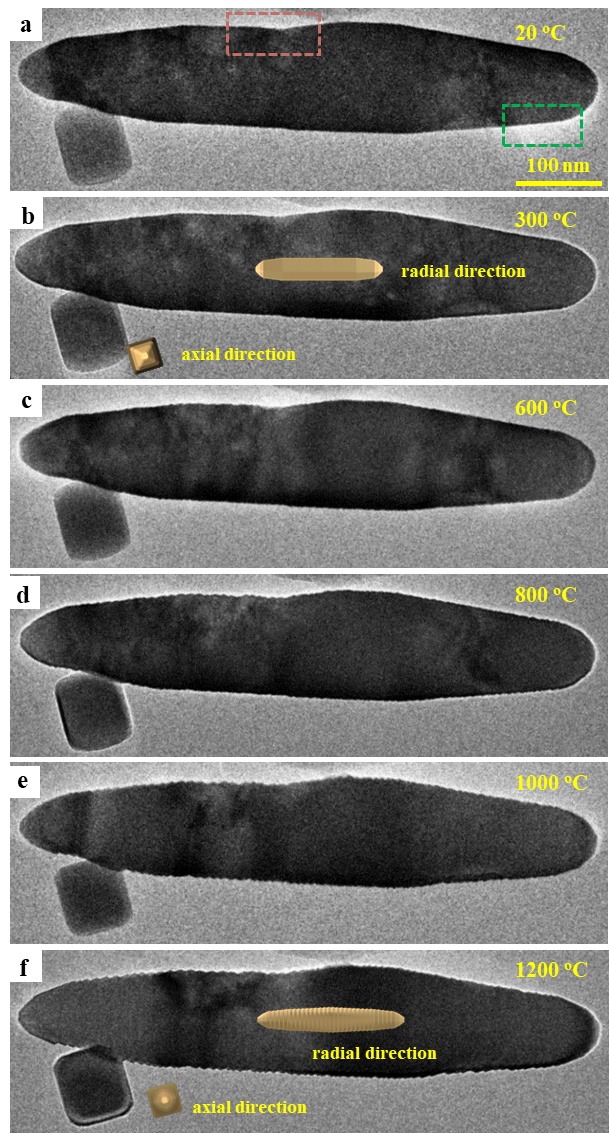
**

**Supplementary Fig. 2. a-f,** In situ TEM images from (Supplementary Video 1) show the structure evolution of the typical anatase TiO2 nanorods in the heating process in vacuum (Temperature: 20-1200 °C; TEM column pressure: 5×10-5Pa).The two TiO2 nanorods were observed from two directions, both axial [001] and radial [010] viewing directions, respectively.

**
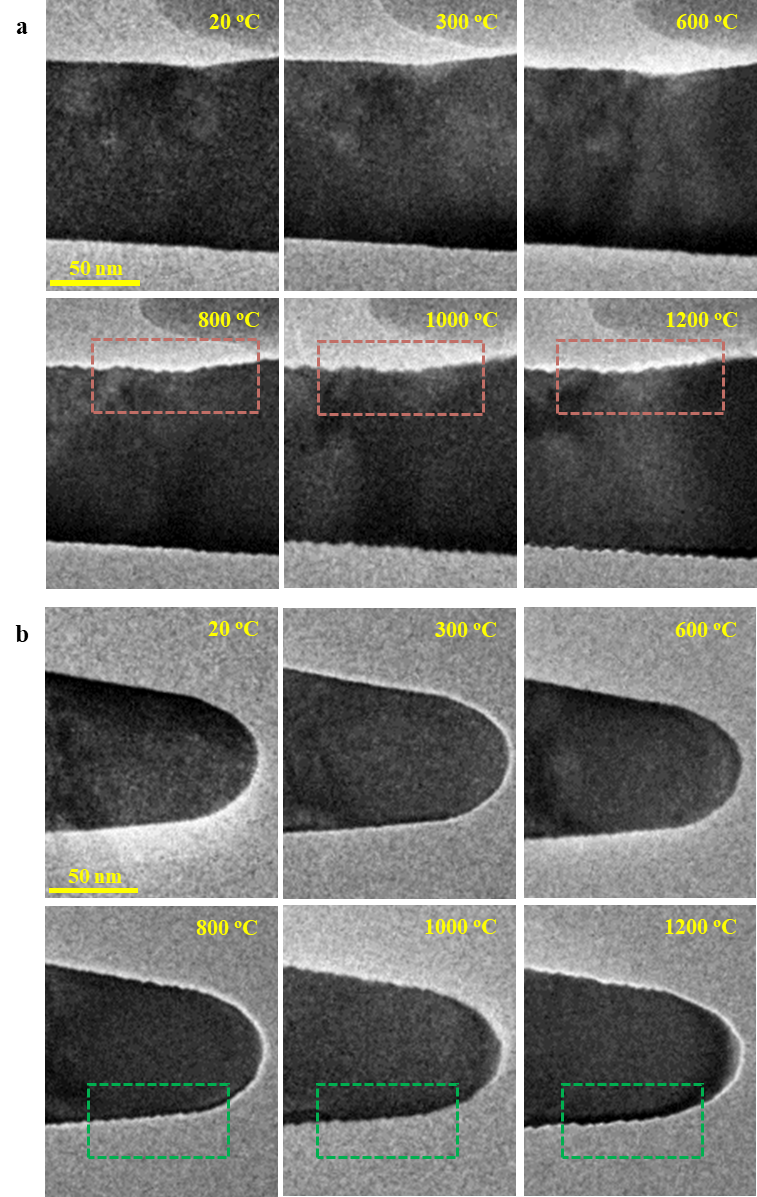
**

**Supplementary Fig. 3. (a-b) The enlarged in situ TEM images show the structural evolution of the marked area (red box and green box areas) in Supplementary Fig. 2a.** The images were collected in the heating process in vacuum (TEM column pressure: 5×10-5 Pa) show the at the corresponding temperatures. During the heating process, the originally flat {100} surfaces (**a**) and (301) surfaces (**b**) became roughened, reconstructing into distinct protruding structures.

**
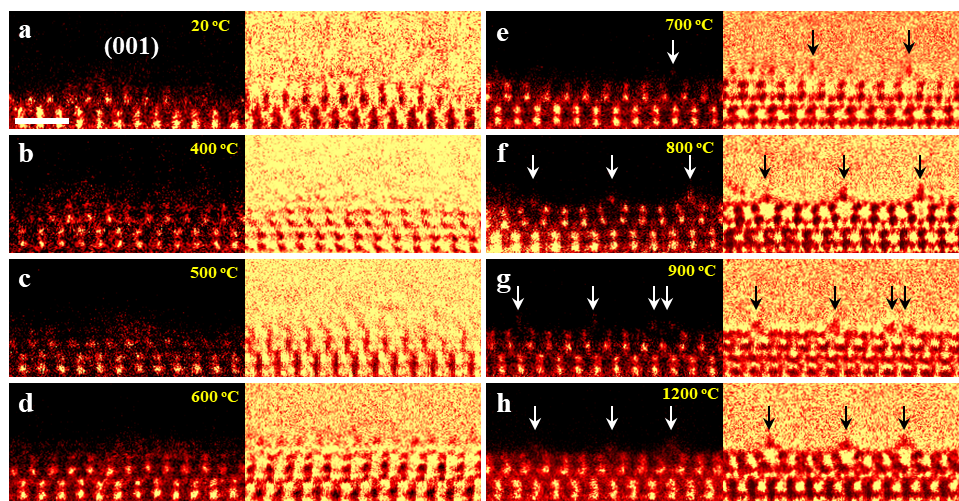
**

**Supplementary Fig. 4. The atomic structural evolution of the anatase TiO2 nanorod tip surface at the elevated temperatures.** (a-h) The atomic level in situ HAADF STEM images show the structure evolution of (001) surface at the tip of anatase TiO2 nanorod, in vacuum (Temperature: 20 °C to 1200 °C; TEM column pressure: 5×10-5 Pa). Scale bar: 2nm. During the heating process, the defective (001) surface progressively gradually becomes unstable and begins to undergo reconstruction above 700 °C, and ultimately forms a (1×4) reconstruction structure at 1200 °C.

**
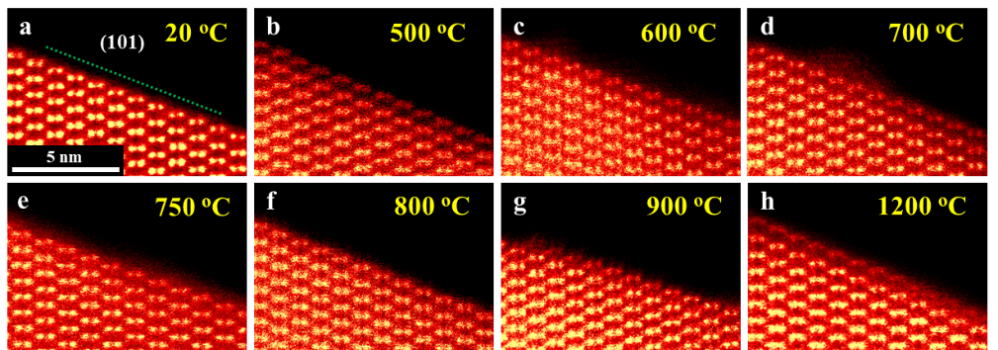
**

**Supplementary Fig. 5.** (a) The atomic-level HAADF STEM images show the structure evolution of anatase TiO2 (101) surface, in vacuum. (TEM column pressure: 5×10-5Pa). The images (b-h) are acquired at the corresponding temperatures.

**
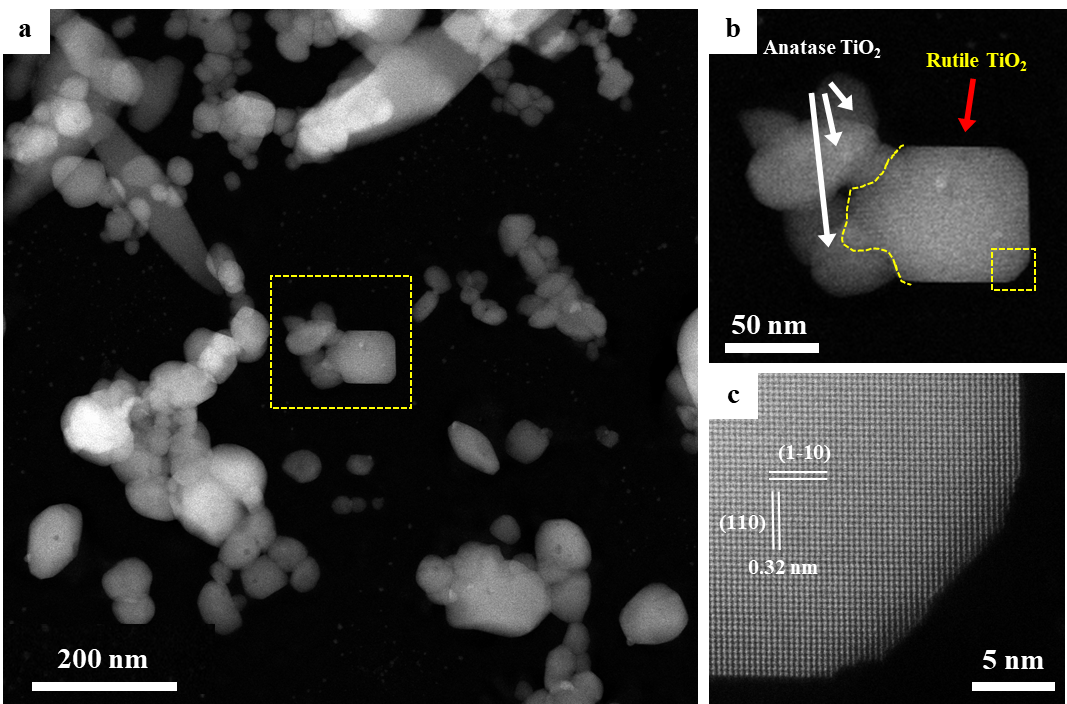
**

**Supplementary Fig. 6.** **The in situ HAADF STEM images show the nucleation of rutile TiO2 crystallite (Temperature: 1000 °C; TEM column pressure: 5×10-5Pa).** **a-c**, The low magnification (**a-b**) and the atomic level (**c**) HAADF STEM images show the rutile TiO2 nucleatedat the multi-grain boundaries by the convergence of adjacent anatase TiO2 particles.

**Captions of Videos**

**Video 1:** **In situ TEM video show the structure evolution of the typical anatase TiO2 nanorods in the heating process in vacuum, viewed along both axial and radial directions. (**Temperature: 20-1200 °C; TEM column pressure: 5×10-5 Pa).

**Video 2: In situ atomic level STEM video show the surface structural evolution during the restructuring of a single crystalline TiO2 nanorod, indicating a significant** **mass transportation via surface diffusion.** The video collected at 1000 °C in vacuum (TEM column pressure: 5×10-5 Pa)

**Video 3: In situ STEM video show the surface structural evolution of the sample in Video 1 at low magnification.** The video collected at 1000 °C in vacuum (TEM column pressure: 5×10-5 Pa)
